# Supplementary material
Source: Springer Nature journal article supplement (https://www.springermedizin.de/resource/supplementary/13048_2014_283_MOESM3_ESM.pdf/9665306)

Cumulative Survival

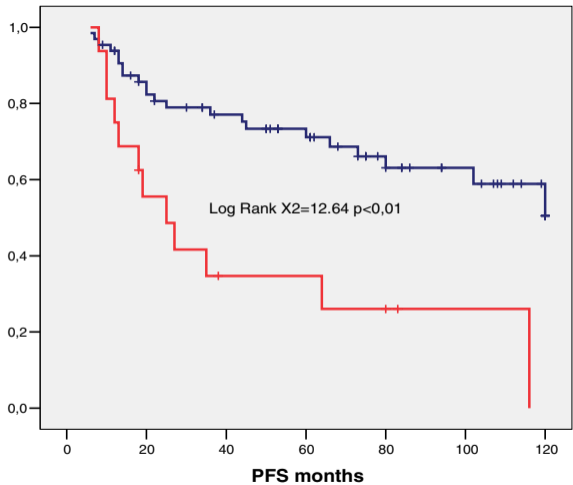

PFS months

A

Cumulative Survival

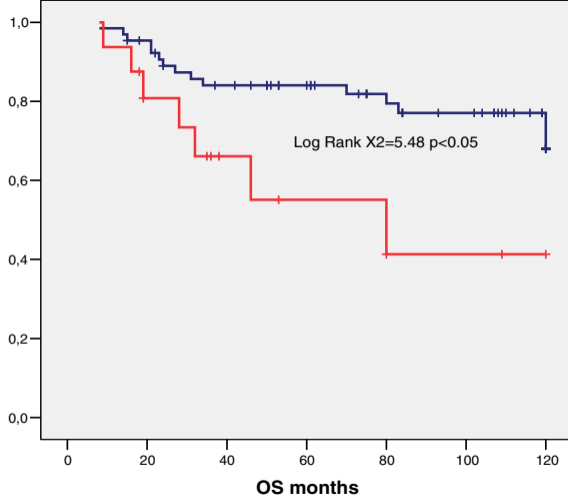

OS months

B

Supplement: MOESM3 [file 9665306]
